# Supplementary material for: Design and evaluation of nanoscale materials with programmed responsivity towards epigenetic enzymes
Source: Royal Society of Chemistry journal article supplement (doi:10.1039/d4tb00514g), 2024-01-01
Supplement: d4tb00514g1.pdf [file d4tb00514g1.pdf]

## Supporting Information

### **Design and Evaluation of Nanoscale Materials with Programmed Responsivity towards Epigenetic Enzymes**

*Priyanka Ray*<sup>1</sup>, *Abbas Sedigh*<sup>2</sup>, *Matthew Confeld*<sup>3</sup>, *Lina Alhalhooly*<sup>4</sup>, *Kweeni Iduoku*<sup>1</sup>,  
*Gerardo M. Casanola-Martin*<sup>1</sup>, *Hai Pham-The*<sup>5</sup>, *Bakhtiyor Rasulev*<sup>1</sup>, *Yongki Choi*<sup>4</sup>, *Zhongyu Yang*<sup>2</sup>, *Sanku Mallik*<sup>2</sup>, *Mohiuddin Quadir*<sup>1,\*</sup>

<sup>1</sup>Department of Coatings and Polymeric Materials, North Dakota State University, Fargo, ND 58102, United States.

<sup>2</sup>Department of Pharmaceutical Sciences, North Dakota State University, Fargo, ND 58102, United States.

<sup>3</sup>Department of Physics, North Dakota State University, Fargo, ND 58102

<sup>4</sup>Department of Chemistry and Biochemistry, North Dakota State University, Fargo, ND 58102, United States.

<sup>5</sup> University of Science and Technology of Hanoi, Vietnam Academy of Science and Technology, 18 Hoang Quoc Viet, Cau Giay, Hanoi 10000, Vietnam.

\*Correspondence to:

- Mohiuddin Quadir, Phone: +1-701-231-6283,

Email: [mohiuddin.quadir@ndsu.edu](mailto:mohiuddin.quadir@ndsu.edu)

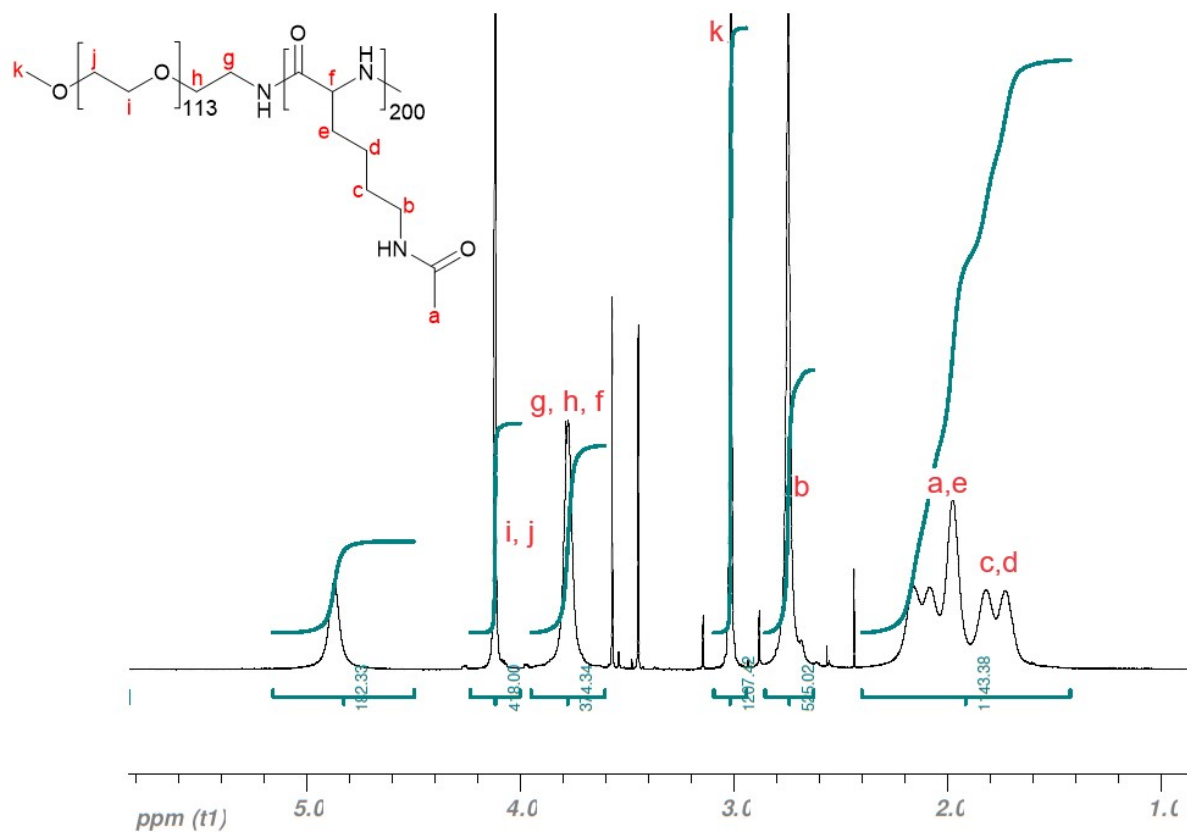

**Figure S1A:**  $^1\text{H}$  NMR spectrum of acetylated PEG-b-poly(L-lysine) in TFA-*d*

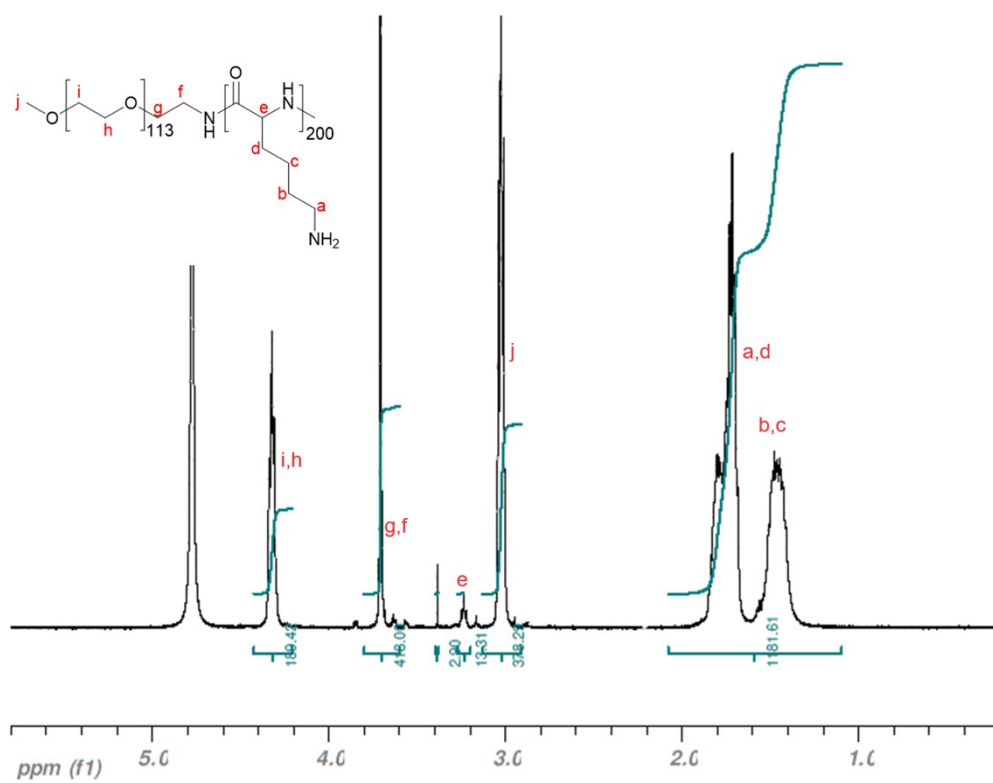

**Figure S1B:**  $^1\text{H}$  NMR spectrum of the starting material, PEG-b-poly(L-lysine).

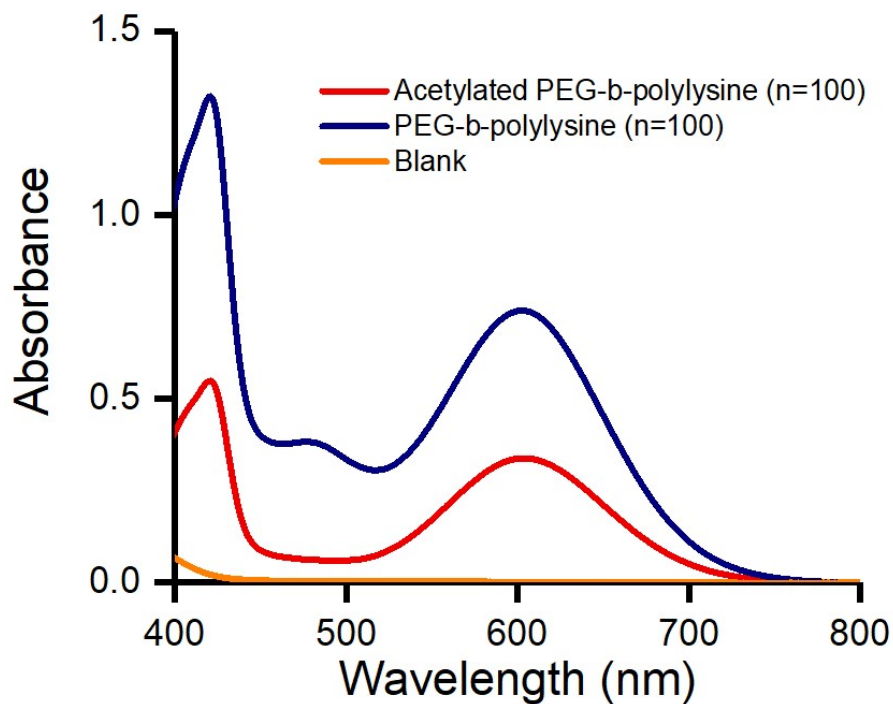

**Figure S2.** Absorbance spectra of block copolymers pre- and post-deacetylation using the ninhydrin test. The Ninhydrin test clearly shows the reduction of absorbance intensity originated from primary amines of PEG-block-poly(L-lysine) block copolymers due to acetylation. The Ninhydrin test using the wavelength of 570 nm was used to quantify and the percentage functionalization was calculated using the following equation:

$$mg\ of\ \alpha\ -\ amino\ acid = \frac{Abs_{test} - Abs_{blank}}{Abs_{standard} - Abs_{blank}}$$

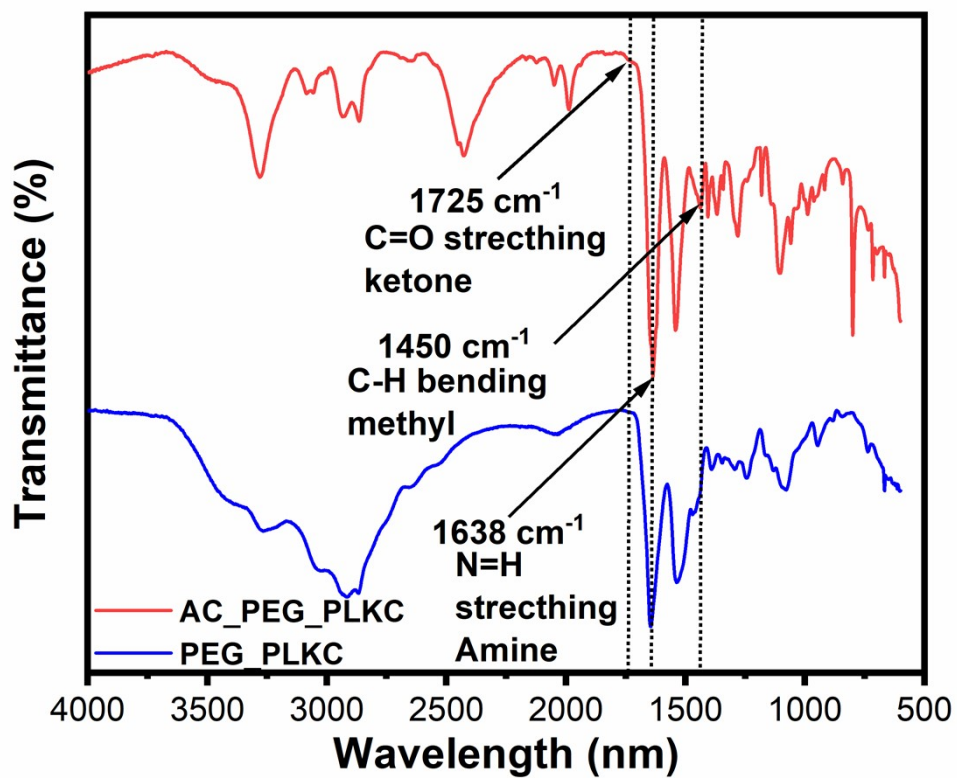

**Figure S3:** Comparative FTIR studies of the starting materials, PEG-block-poly(L-lysine) and the product, PEG-block-poly (acetylated L-lysine).

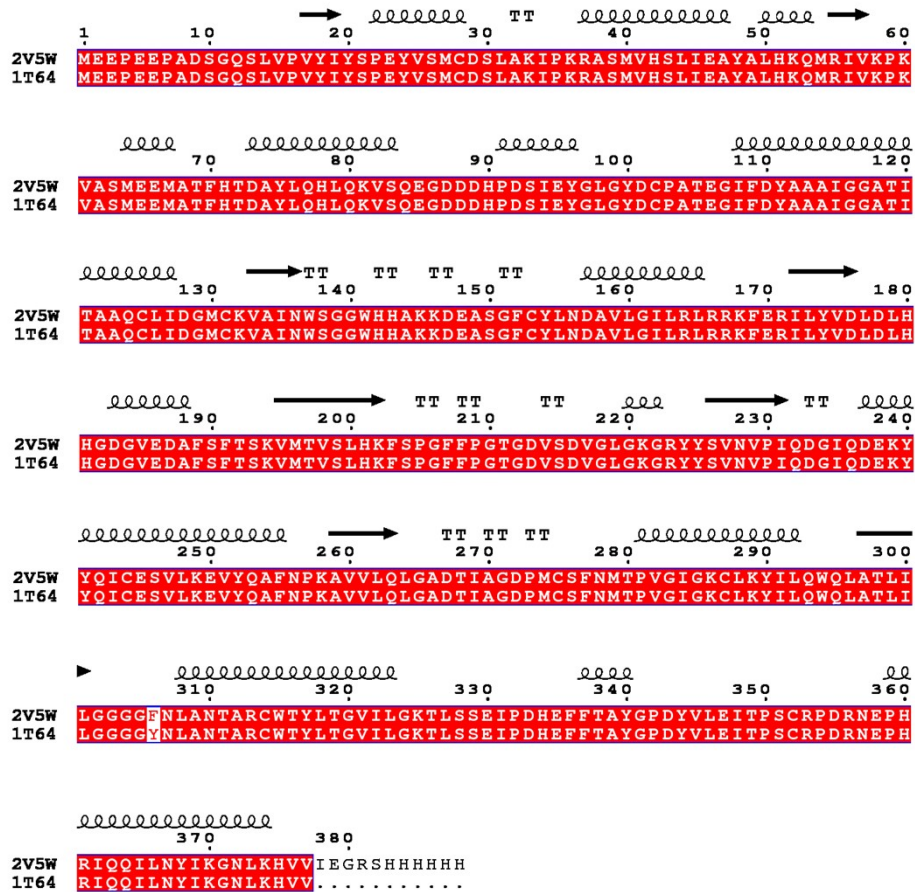

**Figure S4.** Sequence alignment between Tyr306Phe mutated (2V5W) and non-mutated (1T64) HDAC8.

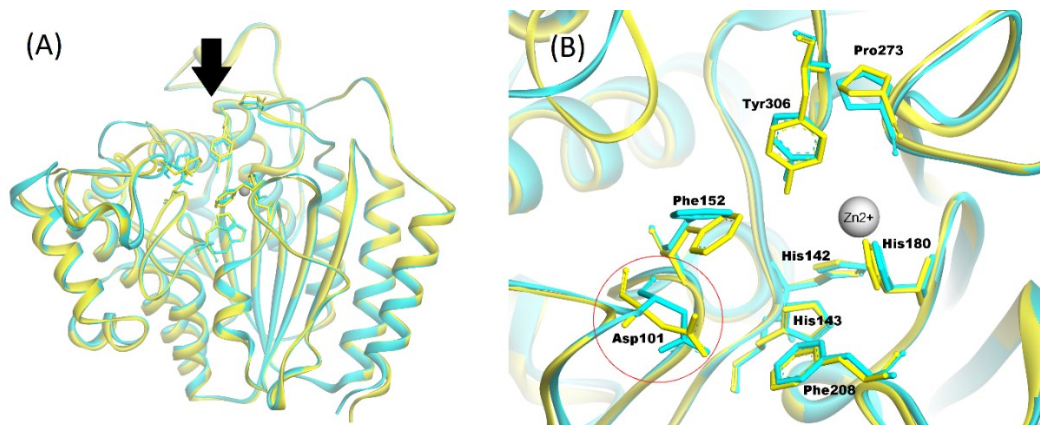

**Figure S5.** (A) Structural alignment of optimized Tyr<sup>306</sup>-2V5W and non-mutated HDAC8 (1T64). (B) Visualization from the upper side (black arrow) revealed the movement of residues in the active site of two protein structures.
